# Supplementary material
Source: PubMed Central journal article supplement (PMC2682461)
Supplement: jc.2008-1986_1.pdf [file jc.2008-1986_1.pdf]

**SUPPLEMENTAL FIGURE:**

**ROC analysis for localization using the fold response at the dominant artery:**

**CaStim Localization Confirmed By Surgical Localization**

|        |                        | Confirmed                                            | Not Confirmed                           |                                            |
|--------|------------------------|------------------------------------------------------|-----------------------------------------|--------------------------------------------|
| CaStim | Positive Test > 2-fold | 38 (TP)                                              | 2 (FP)                                  | $PPV = TP / (TP + FP)$<br>$38 / 40 = 95\%$ |
|        | Negative Test < 2-fold | 5 (FN)                                               | 0 (TN)                                  | $NPV = TN / (TN + FN)$<br>$NPV = 0\%$      |
|        |                        | $Sensitivity = TP / (TP + FN)$<br>$38 / 43 = 88.4\%$ | $Specificity = TN / (TN + FP)$<br>$0\%$ |                                            |

**ROC of Fold Response At Dominant Artery**

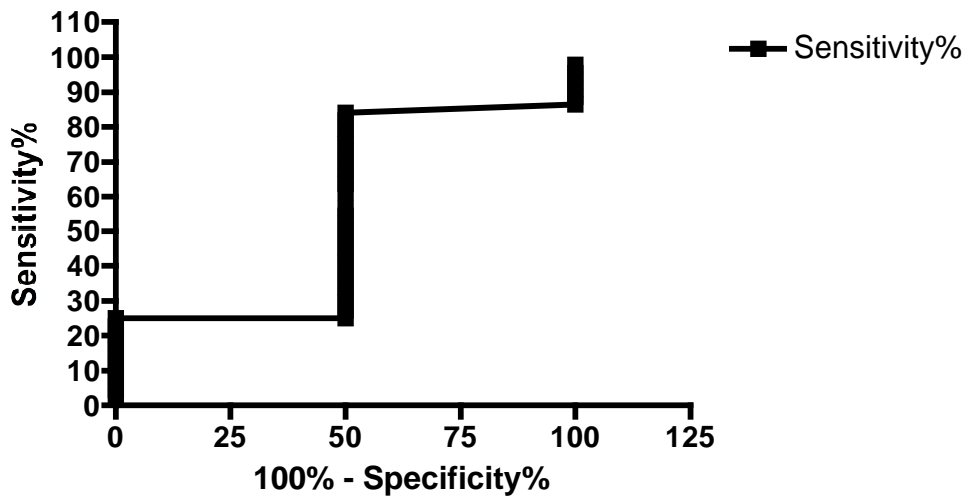

| <b>Cutoff Fold Response at Dominant Artery</b> | <b>Sensitivity%</b> | <b>95% CI</b>           | <b>Specificity%</b> | <b>95% CI</b>           |
|------------------------------------------------|---------------------|-------------------------|---------------------|-------------------------|
| <b>&gt; 1.574</b>                              | <b>97.73</b>        | <b>87.98% to 99.94%</b> | <b>0</b>            | <b>0.0% to 84.19%</b>   |
| > 1.665                                        | 95.45               | 84.53% to 99.44%        | 0                   | 0.0% to 84.19%          |
| > 1.730                                        | 93.18               | 81.34% to 98.57%        | 0                   | 0.0% to 84.19%          |
| > 1.790                                        | 90.91               | 78.33% to 97.47%        | 0                   | 0.0% to 84.19%          |
| <b>&gt; 2.020</b>                              | <b>88.64</b>        | <b>75.44% to 96.21%</b> | <b>0</b>            | <b>0.0% to 84.19%</b>   |
| > 2.430                                        | 86.36               | 72.65% to 94.83%        | 0                   | 0.0% to 84.19%          |
| > 2.660                                        | 84.09               | 69.93% to 93.36%        | 50                  | 1.258% to 98.74%        |
| > 2.715                                        | 81.82               | 67.29% to 91.81%        | 50                  | 1.258% to 98.74%        |
| > 2.755                                        | 79.55               | 64.70% to 90.20%        | 50                  | 1.258% to 98.74%        |
| > 2.810                                        | 77.27               | 62.16% to 88.53%        | 50                  | 1.258% to 98.74%        |
| <b>&gt; 2.920</b>                              | <b>75</b>           | <b>59.66% to 86.81%</b> | <b>50</b>           | <b>1.258% to 98.74%</b> |
| > 3.250                                        | 72.73               | 57.21% to 85.04%        | 50                  | 1.258% to 98.74%        |
| > 3.560                                        | 70.45               | 54.80% to 83.24%        | 50                  | 1.258% to 98.74%        |
| > 3.795                                        | 68.18               | 52.42% to 81.39%        | 50                  | 1.258% to 98.74%        |
| > 4.150                                        | 65.91               | 50.08% to 79.51%        | 50                  | 1.258% to 98.74%        |
| > 4.625                                        | 63.64               | 47.77% to 77.59%        | 50                  | 1.258% to 98.74%        |
| > 5.135                                        | 61.36               | 45.50% to 75.64%        | 50                  | 1.258% to 98.74%        |

**Supplemental Figure Legend:** Due to the invasive nature of the test, no normal<sup>1</sup> controls have undergone the procedure at NIH (true negative (TN) patients = 0). Only patients with a diagnosis of insulinoma based on a + fast have been studied. Thus, the values for sensitivity, specificity, positive predictive value (PPV) and negative predictive value (NPV) are derived from a population with 100% prevalence for insulinoma. If one defines sensitivity as true positives (TP) divided by the sum of true positives (TP) and false negatives (FN); then the sensitivity for a 2-fold response is 88% (95% confidence interval of 76-96%). In this population the low false negative localization rate of the CaStim, contrasts to the high false negative rates of CT, MRI and trans-abdominal US. Sensitivity/specificity for different cutoff values derived from fitting our data on an ROC curve are given for responses of 1.5-fold to 5-fold [refer to table above]. If the diagnosis of insulinoma is established with a positive fast, then the PPV of the CaStim is 95% for a 2-fold response and 98% for a 3-fold response. Thus in this setting, using a 2-fold cutoff value; the positive CaStim localization will be a true positive localization 95% of the time.

1

\*One case of factitious hypoglycemia underwent the test

41. **Hirshberg B, Skarulis MC, Pucino F, Csako G, Brennan R, Gorden P** 2001 Repaglinide-induced factitious hypoglycemia. *J Clin Endocrinol Metab* 86:475-477.<sup>1</sup>

1. **Hirshberg B, Skarulis MC, Pucino F, Csako G, Brennan R, Gorden P** 2001  
Repaglinide-induced factitious hypoglycemia. *J Clin Endocrinol Metab* 86:475-477
